# Supplementary material for: Effects of environmental factors on the influence of tillage conversion on saturated soil hydraulic conductivity obtained with different methodologies: a global meta-analysis
Source: Copernicus journal article supplement (doi:10.5194/soil-8-309-2022), 2022-04-08
Supplement: Supplementary file 1 [file soil-8-309-2022-supplement.pdf]

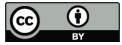

*Supplement of*

**Effects of environmental factors on the influence of tillage conversion on saturated soil hydraulic conductivity obtained with different methodologies: a global meta-analysis**

**Kaihua Liao et al.**

*Correspondence to:* Qing Zhu (qzhu@niglas.ac.cn)

The copyright of individual parts of the supplement might differ from the article licence.

**Table S1** Site characteristics from a global meta-analysis of 69 studies.

| Reference                   | Country  | Site                                                                                                                               | Vegetation type               | MAT <sup>a</sup><br>(°C) | MAP <sup>b</sup> (mm) | Elevation<br>(m asl) |
|-----------------------------|----------|------------------------------------------------------------------------------------------------------------------------------------|-------------------------------|--------------------------|-----------------------|----------------------|
| Abu and Abubakar (2013)     | Nigeria  | The experimental field of the Institute for Agricultural Research, Ahmadu Bello University                                         | Soybean                       |                          | 1011 ± 161            | 686                  |
| Afyuni and Wagger (2006)    | USA      | Lower Coastal Plain Research Station, North Carolina                                                                               | Corn and Soybean              |                          |                       |                      |
| Alletto and Coquet (2009)   | France   | An agricultural field in the large alluvial corridor of the Garonne River                                                          | Maize                         |                          |                       |                      |
| Anikwe and Ubochi (2007)    | Nigeria  | Faculty Research Farm of Faculty of Agriculture and Natural Resources Management, Enugu State University of Science and Technology | Sweet potato                  |                          | 1700~2010             | 450                  |
| Azooz et al. (1996)         | Canada   | Dawson Creek site and Rolla site                                                                                                   | Barley and canola             | 0.9                      | 504                   |                      |
| Baumhardt et al. (2012)     | USA      | The USDA-ARS Conservation and Production Research Laboratory, Bushland, TX                                                         | Wheat–sorghum–fallow rotation |                          |                       |                      |
| Blanco-Canqui et al. (2017) | USA      | The University of Nebraska’s Rogers Memorial Farm                                                                                  | Corn and soybean              |                          | 693                   | 368                  |
| Blanco-Canqui et al. (2004) | USA      | Midwest Research Claypan Farm (McCredie), Kingdom City, MO                                                                         | Corn and soybean              |                          |                       |                      |
| Busari (2017)               | Nigeria  | The Federal University of Agriculture, Abeokuta                                                                                    | Maize                         | 30~37                    | 1058                  |                      |
| Cai et al. (2012)           | China    | An experimental field in the Dingxi County                                                                                         | Wheat and pea                 | 6.4                      | 390.9                 | 2000                 |
| Cameira et al. (2003)       | Portugal | An Experimental Farm located in the Sorraia River Watershed                                                                        | Maize                         |                          |                       |                      |
| Cui et al. (2013)           | China    | A field experiment in Ningxiang County of Hunan Province                                                                           | Rice                          | 16.8                     | 1360                  | 80                   |

|                            |          |                                                                                                                                    |                   |          |           |          |
|----------------------------|----------|------------------------------------------------------------------------------------------------------------------------------------|-------------------|----------|-----------|----------|
| Curtis and Claassen (2009) | USA      | Three research sites in northern California                                                                                        | Grass             | 2.6~6.3  | 937~1669  | 583~1601 |
| De Almeida et al. (2018)   | Brazil   | The study was carried out during the wet season in the municipality of Aquidauana, MS, Brazil                                      | Soybeans          | 24~26    | 1300~1600 | 191      |
| Du et al. (2011)           | China    | Luancheng Agro-Ecosystem Experimental Station of Chinese Academy of Sciences                                                       | Wheat and maize   | 12.5     | 536       | 50.1     |
| Fasinmirin (2011)          | Brazil   | An experimental site of the Department of Soils, Federal University of Santa Maria                                                 |                   | 22       |           |          |
| Gao and Zhang (2010)       | China    | Dry farming experimental station of Gansu Agricultural University                                                                  | Maize             | 6.4      | 390.9     | 2000     |
| Gómez et al. (1999)        | Spain    | An experimental olive orchard in Santaella                                                                                         | Olive             |          | 606       |          |
| Gupta et al. (1997)        | Canada   | The study was conducted at Kinore Experimental Farm of Agriculture Canada located within the Great Lake region of Ontario (Canada) |                   |          |           |          |
| Haruna et al. (2018)       | USA      | Lincoln University's Freeman Center                                                                                                | Corn              |          |           | 166      |
| Hati et al. (2015)         | India    | The research farm of Indian Institute of Soil Science, Bhopal                                                                      | Soybean and wheat |          | 1130      | 485      |
| He et al. (2009)           | China    | A long-term tillage experiment located in the village of Chenghuang                                                                | Winter wheat      | 10.7     | 555       | 456      |
| Iqbal et al. (2005)        | Pakistan | The Research Area of Institute of Soil and Environmental Sciences, University of Agriculture, Faisalabad                           | Wheat             |          |           |          |
| Jakab et al. (2017)        | Hungary  | Measurements were carried out at the Szentgyörgyvár soil erosion experimental site                                                 | Maize             | 11.0     | 628       |          |
| Jarecki and Lal (2005)     | USA      | Ohio Agricultural Research and Development Center Western and North Western Branch Research Farm                                   | Corn and soybean  | 9.9~10.8 | 845~1043  |          |

|                                |           |                                                                                                                                             |                        |      |       |       |
|--------------------------------|-----------|---------------------------------------------------------------------------------------------------------------------------------------------|------------------------|------|-------|-------|
| Jemai et al. (2012)            | Tunisia   | Hamrounia region, near the municipality of Mateur                                                                                           | Wheat                  | 18.2 | 560   | 153   |
| Johnson-Maynard et al. (2007)  | USA       | The University of Idaho's Kambitsch Research Farm                                                                                           | Pea, wheat and barley  |      | 695   |       |
| Kahlon et al. (2013)           | USA       | The Waterman Farm of the Ohio State University                                                                                              | Wheat                  | 11   | 1016  |       |
| Kahlon and Chawla (2017)       | India     | The Research Farm of the Department of Soil Science, Punjab Agricultural University                                                         | Wheat and maize        |      |       | 247   |
| Kennedy and Schillinger (2006) | USA       | A 2-yr field experiment was conducted on three paired farms located between the towns of LaCrosse and Colfax in Whitman County, WA          | Wheat                  |      |       |       |
| Khorami et al. (2018)          | Iran      | The experiment was conducted at the Zarghan Field Station, Agriculture and Natural Resources Research and Education Center of Fars Province | Wheat and maize        |      |       | 1604  |
| Kreiselmeier et al. (2020)     | Germany   | An experimental field with a Haplic Luvisol in Eastern Germany                                                                              | Wheat and sugar beet   |      |       | 275   |
| Langhans et al. (2011)         | Belgium   | The experimental field is located in the Belgian part of the Western and Central European Loess Belt, near Huldenberg                       | Maize                  |      | 800   |       |
| Liu et al. (2018)              | China     | Fengqiu County, Henan Province                                                                                                              | Wheat and poplar trees | 13.9 | 615   | 65~73 |
| Lozano et al. (2016)           | Argentina | An experimental field in the Pampas region                                                                                                  | Wheat and soybean      |      | 1000  |       |
| Luo et al. (2005)              | China     | An experimental field in the Dingxi County                                                                                                  | Wheat and pea          | 6.4  | 390.9 | 2000  |
| Maulé and Reed (1993)          | Canada    | The project was carried out on five different fields located 13 km to the south of the town of Indian Head, SK                              | Wheat                  | 2.0  | 175   |       |
| McGarry et al. (2000)          | Australia | The site is located at the Biloela Research Station, Qld                                                                                    | Crop and pasture       |      |       | 173   |

|                             |           |                                                                                                                                               |                                                 |     |       |      |
|-----------------------------|-----------|-----------------------------------------------------------------------------------------------------------------------------------------------|-------------------------------------------------|-----|-------|------|
| Moebius-Clune et al. (2008) | USA       | A long-term controlled experiment located at Chazy                                                                                            | Maize                                           |     |       |      |
| Moebius et al. (2007)       | USA       | Cornell University research farms in Willsboro, Chazy and Aurora in New York                                                                  | Maize                                           |     |       |      |
| Merwin et al. (1994)        | USA       | The experiment was established in a former apple orchard at Ithaca, N.Y.                                                                      | Orchard                                         |     |       |      |
| Ndiaye et al. (2005)        | Senegal   | The experiment was conducted on a sandy loam on the Thyse-Kaymor catchment located in the Senegalese groundnut belt (central part of Senegal) | Groundnut and millet                            |     | 660   |      |
| Nyamadzawo et al. (2007)    | Zimbabwe  | The experiment site was conducted at the Domboshawa Training Centre and is 30 km north of Harare                                              | Maize                                           |     | 750   | 1400 |
| Obalum and Obi (2010)       | Nigeria   | Three experimental plots at Nsukka                                                                                                            | Sorghum and soybean                             |     | 1600  |      |
| Osunbitan et al. (2005)     | Nigeria   | Teaching and Research Farm of the Obafemi Awolowo University                                                                                  |                                                 |     | 1350  |      |
| Pan et al. (2016)           | China     | Changwu State Key Loess Plateau Agro-Ecological Experimental Station of the Chinese Academy of Sciences                                       | Maize                                           | 9.1 | 578.5 |      |
| Park et al. (1992)          | Australia | Two experimental sites were established in central western New South Wales, at Cowra and Grenfell                                             | Wheat/pasture rotation and clover/grass pasture |     |       |      |
| Park and Smucker (2005)     | USA       | Wooster and Hoytville research sites of the Ohio Agricultural Research and Development Center                                                 | Corn                                            |     |       |      |
| Parvin et al. (2014)        | Sweden    | An experimental site managed by the Swedish University of Agricultural Sciences, Uppsala                                                      | Barley                                          |     |       |      |

|                            |           |                                                                                                                                         |                            |      |      |     |
|----------------------------|-----------|-----------------------------------------------------------------------------------------------------------------------------------------|----------------------------|------|------|-----|
| Potter et al. (1995)       | USA       | Studies were conducted on a Houston Black clay soil which had been under continuous management for four years using the wide bed system | wheat-com-grain sorghum    |      |      |     |
| Ramos et al. (2019)        | Spain     | The experimental field was located in Agramunt, NE                                                                                      | Maize                      | 13.9 | 392  | 330 |
| Sartori et al. (2022)      | Italy     | The experiment took place at the Lucio Toniolo Experimental Farm, located in Legnaro, PD                                                | Wheat                      |      | 850  | 6   |
| Sasal et al. (2006)        | Argentina | The Pergamino Experimental Station of the Instituto Nacional de Tecnología Agropecuaria                                                 | Soybean                    |      | 1000 |     |
| Schlüter et al. (2020)     | Germany   | The long-term field in Lüttewitz                                                                                                        | Wheat and sugar beet       | 8.1  | 643  | 275 |
| Sharma et al. (2005)       | India     | A field experiment at Hayathnagar Research Farm                                                                                         | Sorghum and castor         | 25.7 | 746  | 515 |
| Sharma et al. (2009)       | India     | A field experiment at Hayathnagar Research Farm                                                                                         | Sorghum and mung bean      |      | 750  | 515 |
| Singh et al. (1996)        | Canada    | The Eilerslie Research Station                                                                                                          | Barley                     |      | 455  | 694 |
| Smith et al. (2007)        | USA       | Two adjacent fields near Waterloo, IN                                                                                                   | Corn/soybean rotation      |      |      |     |
| So et al. (2009)           | Australia | A field experiment was conducted at a site in Grafton, NSW, which has previously been under pasture for at least 5 years                | Soybean and cereal of oats |      |      |     |
| Soracco et al. (2010)      | Argentina | An experiment site near the town of San Antonio de Areco                                                                                | Soybean                    |      | 1100 |     |
| Starr and Glotfelty (1990) | USA       | The field experiment was conducted at the University of Maryland, Forage Research Farm, Clarksville, MD                                 | Corn                       |      |      |     |
| Steenhuis et al. (1990)    | USA       | This study was conducted at Cornell University's Experimental Research Farm in the town of Willsboro,                                   | Corn                       |      |      |     |

|                           |           |                                                                   |                                           |           |          |      |  |
|---------------------------|-----------|-------------------------------------------------------------------|-------------------------------------------|-----------|----------|------|--|
|                           |           | New York                                                          |                                           |           |          |      |  |
| Stone and Schlegel (2010) | USA       | An experimental field near Tribune, Kansas                        | Wheat and sorghum                         | 11.2      | 425      | 1108 |  |
| Tan et al. (2002)         | Canada    | Two 2-ha field sites                                              | Soybean                                   |           |          |      |  |
| TerAvest et al. (2015)    | Malawi    | This study was carried out in the Central region of Malawi        | Cassava, soybean, and maize               | 21.0~26.6 | 834~1450 | 1146 |  |
| Villarreal et al. (2017)  | Argentina | The experiment was carried out near the town of Chascomús         | Soybean                                   |           | 1000     |      |  |
| Wu et al. (2014)          | China     | Dry farming experimental station of Gansu Agricultural University | Wheat and pea                             | 6.4       | 390.9    | 2000 |  |
| Xin et al. (2005)         | China     | An experimental site in Dingxi County                             | Lucerne and Lucerne-spring wheat rotation | 6.4       | 390.9    | 2000 |  |
| Xu and Mermoud (2001)     | China     | An experimental site in the Xiongxian area                        | Summer maize                              |           | 540      |      |  |

<sup>a</sup> Mean annual temperature; <sup>b</sup> Mean annual precipitation.

**Table S2** Experimental conditions from a global meta-analysis of 69 studies.

| Reference                   | $N^a$ | Measurement technique <sup>b</sup> | Measurements |             | OMC <sup>e</sup> (%) | Time interval from tillage conversion to measurement (yr) | General descriptions                                                                                                                                                                                                                                                                                                                                |
|-----------------------------|-------|------------------------------------|--------------|-------------|----------------------|-----------------------------------------------------------|-----------------------------------------------------------------------------------------------------------------------------------------------------------------------------------------------------------------------------------------------------------------------------------------------------------------------------------------------------|
|                             |       |                                    | $IR^c$       | $K_{sat}^d$ |                      |                                                           |                                                                                                                                                                                                                                                                                                                                                     |
| Abu and Abubakar (2013)     | 6     | Constant head                      |              | √           |                      | 2 (2010~2011)                                             | Cores were collected at three depths (0–5, 5–15, and 15–30 cm).                                                                                                                                                                                                                                                                                     |
| Afyuni and Wagger (2006)    | 18    | Constant head                      |              | √           | 0.91~1.40            |                                                           | Cores were collected at three depths (0–15, 15–30, and 30–45 cm).                                                                                                                                                                                                                                                                                   |
| Alletto and Coquet (2009)   | 9     | Tension disc (8)                   | √            | √           | 1.38~2.24            | 6 (2000~2005)                                             | Infiltrations were done at –1.5, –1.0, –0.6, –0.3 and –0.1 kPa matric potentials.                                                                                                                                                                                                                                                                   |
| Anikwe and Ubochi (2007)    | 3     | Not provided                       |              | √           | 2.67                 | 2 (2005~2006)                                             |                                                                                                                                                                                                                                                                                                                                                     |
| Azooz et al. (1996)         | 8     | Guelph                             |              | √           | 1.72~4.31            | 16 (1978~1993)                                            | The $K_{sat}$ to a depth of 300 mm in 75-mm depth increments was determined.<br>We applied reverse-osmosis water in lieu of rainwater because of its dispersive characteristics at a rate of 78 mm h <sup>-1</sup> with a rotating-disk rain simulator that produced impact energy of 22 J mm <sup>-1</sup> m <sup>-2</sup> or 80% of natural rain. |
| Baumhardt et al. (2012)     | 4     | Rainfall simulator                 | √            |             |                      | 3                                                         | Two intact soil cores (7.5 cm diam. And 7.5 cm long) per plot were collected using a hammer-driven core sampler for depths of: 0–7.5, 7.5–15, 15–22.5, and 22.5–30 cm.                                                                                                                                                                              |
| Blanco-Canqui et al. (2017) | 2     | Constant head                      |              | √           |                      | 35 (1980~2014)                                            | Cores were collected vertically from 0 to 100 and 100 to 200 mm from trafficked and nontrafficked                                                                                                                                                                                                                                                   |
| Blanco-Canqui et al. (2004) | 4     | Either constant or falling head    |              | √           | 1.45~1.63            | 14 (1982~1995)                                            |                                                                                                                                                                                                                                                                                                                                                     |



|                            |   |                    |   |           |                              |                                                                                                                                                                                                                                                                                                                               |
|----------------------------|---|--------------------|---|-----------|------------------------------|-------------------------------------------------------------------------------------------------------------------------------------------------------------------------------------------------------------------------------------------------------------------------------------------------------------------------------|
| Busari (2017)              | 2 | Constant head      | √ | 2.09      | 3 (2008~2010)                | interrow positions.<br>Undisturbed soil samples using cylindrical cores (5 cm in diameter and 5 cm in height) were taken in duplicate from the soil surface.                                                                                                                                                                  |
| Cai et al. (2012)          | 6 | Tension disc       | √ |           | 7 (2001~2007)                |                                                                                                                                                                                                                                                                                                                               |
| Cameira et al. (2003)      | 1 | Tension disc (20)  | √ | 0.47~1.26 | 6 (1998~2003)                | An infiltration sequence was performed corresponding to water tensions of 0, 3, 6 and 15 cm.<br>Three replicated cores were randomly collected with a stainless steel cylinder (4 cm long and 6.18 cm in diameter) at the 0- to 5-, 5- to 10-, 10- to 20-, 20- to 40-, 40- to 60-, and 60- to 80-cm depths.                   |
| Cui et al. (2013)          | 6 | Constant head      | √ | 3.49      | 7 (2005~2011)                |                                                                                                                                                                                                                                                                                                                               |
| Curtis and Claassen (2009) | 4 | Rainfall simulator | √ | 0.03~7.00 | 2 (2003~2004)                |                                                                                                                                                                                                                                                                                                                               |
| De Almeida et al. (2018)   | 1 | Rainfall simulator | √ | 2.55~7.28 | 0.5 (November 2013~May 2014) | We use a portable rainfall simulator calibrated with a constant rain intensity of $60 \pm 1.715 \text{ mm h}^{-1}$ , mean drop diameter of 2.0 mm and pressure of 32 kPa.<br>Cores were collected at three depths (0–5, 5–10, and 10–20 cm).<br>Soil samples were collected at depths 0–10, 10–20, 20–30, 30–40 and 40–50 cm. |
| Du et al. (2011)           | 3 | Constant head      | √ |           | 7 (2001~2007)                |                                                                                                                                                                                                                                                                                                                               |
| Fasinmirin (2011)          | 4 | Falling head       | √ |           | 16                           |                                                                                                                                                                                                                                                                                                                               |
| Gao and Zhang (2010)       | 2 | Tension disc       | √ | 0.36~0.59 | 5 (2005~2009)                |                                                                                                                                                                                                                                                                                                                               |
| Gómez et al. (1999)        | 2 | Rainfall simulator | √ | 1.00~2.50 | 16 (1982~1997)               | The $K_{\text{sat}}$ was calculated at four water tensions; -15, -10, -5 and 0 cm of H <sub>2</sub> O.                                                                                                                                                                                                                        |
| Gupta et al. (1997)        | 1 | Rainfall simulator | √ | 0.00~3.40 | 2 (1992~1993)                | The rainfall was applied by the portable rainfall                                                                                                                                                                                                                                                                             |

|                                |    |                     |   |            |                |                                                                                                                              |                                                          |
|--------------------------------|----|---------------------|---|------------|----------------|------------------------------------------------------------------------------------------------------------------------------|----------------------------------------------------------|
| Haruna et al. (2018)           | 6  | Constant head       | √ | 1.65~1.68  | 5 (2010~2014)  | simulator. The infiltration data was analyzed for the saturated hydraulic conductivity determinations.                       |                                                          |
| Hati et al. (2015)             | 4  | Falling head        | √ | 0.86~1.79  | 8 (2000~2007)  | Cores were collected at four depths of 10-cm increments from the soil surface to a depth of 40 cm.                           |                                                          |
| He et al. (2009)               | 2  | Constant head       | √ |            | 17 (1991~2007) | Undisturbed core samples of 5 cm height and 5 cm diameter were collected from the 0 to 15 cm soil layer at 7.5 cm intervals. |                                                          |
| Iqbal et al. (2005)            | 2  | Guelph              | √ |            |                | Soil samples were collected at depths 0–5, 5–10, 10–20 and 20–30 cm.                                                         |                                                          |
| Jakab et al. (2017)            | 3  | Rainfall simulator  | √ |            | 15             | Rainfall simulation was carried out three times in 2016.                                                                     |                                                          |
| Jarecki and Lal (2005)         | 2  | Constant head       | √ | 0.67~10.67 | 17 (1987~2003) | Soil cores from the 0 to 5-cm layer were used to determine $K_{sat}$ .                                                       |                                                          |
| Jemai et al. (2012)            | 10 | Constant head       | √ | 1.55~3.10  | 8 (2000~2007)  | Soil samples were collected at depths 0–10, 10–20, 20–30, 30–40 and 40–50 cm.                                                |                                                          |
| Johnson-Maynard et al. (2007)  | 2  | Constant head       | √ | 3.07       | 4 (2000~2003)  | cores were sampled in 10-cm increments to a depth of 50 cm.                                                                  |                                                          |
| Kahlon et al. (2013)           | 2  | Constant head       | √ | √          | 1.64~2.59      | 22 (1989~2010)                                                                                                               | Soil cores were collected at depths 0–10 and 10–20 cm.   |
| Kahlon and Chawla (2017)       | 4  | Constant head       | √ |            |                | 2 (2014~2015)                                                                                                                | Soil cores were collected at depths 0–7.5 and 7.5–15 cm. |
| Kennedy and Schillinger (2006) | 9  | Single ring (76)    | √ | 1.28~2.88  | 20             | A 76-cm-diameter single-ring infiltrometer was pushed into the soil to a depth of 5 cm.                                      |                                                          |
| Khorami et al. (2018)          | 1  | Double ring (50~70) | √ | 1.48~1.98  | 3 (2014~2016)  | The double-ring infiltrometer test procedure involved inserting two rings into the 5-cm depth of the                         |                                                          |

|                             |   |                     |   |                 |                |                                                                                                                                                                                                                      |
|-----------------------------|---|---------------------|---|-----------------|----------------|----------------------------------------------------------------------------------------------------------------------------------------------------------------------------------------------------------------------|
| Kreiselmeier et al. (2020)  | 2 | Hood                | √ | 1.95~3.19       | 26 (1992~2017) | soil.<br>The aim was to set between three to four h in descending order from close to saturation down to the bubbling pressure (BP) of the soil. The BP marks the h-limit until which hood measurements can be done. |
| Langhans et al. (2011)      | 1 | Rainfall simulator  | √ | 1.09~1.38       |                | Prior to each experiment, 45 mm h <sup>-1</sup> of rainfall from 3.25 m height from a nozzle-type simulator was applied to the plot until steady state runoff occurred.                                              |
| Liu et al. (2018)           | 1 | Constant head       | √ | 11.35~15.8<br>3 | 6 (2006~2011)  | Soil cores were collected at depth 0–10 cm.                                                                                                                                                                          |
| Lozano et al. (2016)        | 1 | Tension disc (12.5) | √ | √               | 4.00~5.60      | > 5<br>Infiltration runs were performed at three values of soil water pressure head, h (namely, -0.06, -0.03, and 0.0 m).                                                                                            |
| Luo et al. (2005)           | 4 | Tension disc        | √ |                 | 4 (2001~2004)  |                                                                                                                                                                                                                      |
| Maulé and Reed (1993)       | 3 | Rainfall simulator  | √ |                 | 13             | The rainfall occurred over a 1.6 m x 2.3 m area on the ground, but infiltration was determined from a 1.5 m <sup>2</sup> area directly under the simulator.                                                          |
| McGarry et al. (2000)       | 1 | Rainfall simulator  | √ |                 | 8              | Water infiltration parameters were measured with an oscillating nozzle rainfall simulator.                                                                                                                           |
| Moebius-Clune et al. (2008) | 1 | Constant head       | √ |                 | 32 (1973~2004) | Soil cores were collected at depth 5–66 mm.                                                                                                                                                                          |
| Moebius et al. (2007)       | 2 | Constant head       | √ |                 | 13 (1992~2004) | Soil cores were collected at depth 5–66 mm.                                                                                                                                                                          |
| Merwin et al. (1994)        | 3 | Single ring (70)    | √ | 5.30            | 8              | A 70-cm-diameter single-ring infiltrometer was pushed into the soil to a depth of 8 cm.                                                                                                                              |
| Ndiaye et al. (2005)        | 6 | Rainfall simulator  | √ | < 0.5           |                | The rainfall simulator was a 4 m high tower                                                                                                                                                                          |

|                          |   |                                                  |   |           |                |                                                                                                                                                                                                                                                                                                                        |
|--------------------------|---|--------------------------------------------------|---|-----------|----------------|------------------------------------------------------------------------------------------------------------------------------------------------------------------------------------------------------------------------------------------------------------------------------------------------------------------------|
| Nyamadzawo et al. (2007) | 5 | Rainfall simulator                               | √ | ~1.72     | 2 (2001~2002)  | equipped with a Laechler nozzle (# 461.008.30) mounted at 3.86 m above the soil surface.<br>Rainfall simulations were done at the centre of the plots at a rainfall intensity of 35 mm h <sup>-1</sup> on 1 m <sup>2</sup> experimental plots surrounded by a 50 cm buffer zone.                                       |
| Obalum and Obi (2010)    | 3 | Constant head                                    | √ | 1.06~1.48 | 2 (2006~2007)  | Soil cores were collected at depth 0–10 cm.                                                                                                                                                                                                                                                                            |
| Osunbitan et al. (2005)  | 2 | Constant head                                    | √ | 0.30~1.60 |                | Soil cores were collected at depth 0–5 cm.                                                                                                                                                                                                                                                                             |
| Pan et al. (2016)        | 3 | Constant head                                    | √ | 1.34~1.59 | 13 (2002~2014) | Soil cores were collected at depth 0–10 cm.                                                                                                                                                                                                                                                                            |
| Park et al. (1992)       | 4 | Rainfall simulator                               | √ |           | 7 (1981~1987)  | Rainfall simulation studies were conducted on each tillage treatment using a rotating disk simulator.                                                                                                                                                                                                                  |
| Park and Smucker (2005)  | 6 | Constant head                                    | √ | 3.29~7.07 |                | Soil cores were collected at depth 0–5 cm.                                                                                                                                                                                                                                                                             |
| Parvin et al. (2014)     | 3 | Constant head                                    | √ | 3.29~4.48 | 38 (1974~2011) | Soil samples were collected at depths 15–20, 25–30 and 35–40 cm.                                                                                                                                                                                                                                                       |
| Potter et al. (1995)     | 3 | Rainfall simulator                               | √ |           | 8              | A rainfall simulator was used to determine water infiltration characteristics of a Houston Black clay.<br>The susceptibility to sealing of each soil and the steady infiltration rates were evaluated in the laboratory subjecting the soils to rainfall simulation applied at an intensity of 25 mm h <sup>-1</sup> . |
| Ramos et al. (2019)      | 6 | Rainfall simulator                               | √ | 0.57~4.31 | 3              | An inner ring of 60 cm in diameter was used to measure both the row and inter-row areas in the tillage radish plots.                                                                                                                                                                                                   |
| Sartori et al. (2022)    | 1 | Double ring (an inner ring of 60 cm in diameter) | √ | 1.41      | 3              |                                                                                                                                                                                                                                                                                                                        |
| Sasal et al. (2006)      | 1 | Tension disc                                     | √ | 2.30~4.40 | 20             | Tension disc measurements were performed on the                                                                                                                                                                                                                                                                        |

|                            |   |                                  |   |           |                |                                                                                                                                                                                                                                                                                        |
|----------------------------|---|----------------------------------|---|-----------|----------------|----------------------------------------------------------------------------------------------------------------------------------------------------------------------------------------------------------------------------------------------------------------------------------------|
| Schlüter et al. (2020)     | 2 | Hood (24.8) and tension disc (8) | √ | 2.09~2.21 | 27 (1992~2018) | surface at 0.10 m depth for 60 min to reach steady-state conditions.                                                                                                                                                                                                                   |
| Sharma et al. (2005)       | 1 | Constant head                    | √ | 0.64      | 7 (1995~2001)  | For hood, at least half a reservoir had to be infiltrated or 10 min had to pass to move to the next pressure head. Readings were done every 30 s and steady state was assumed after water level decline in the reservoir did not differ by more than 2 mm for three consecutive steps. |
| Sharma et al. (2009)       | 1 | Constant head                    | √ | 0.97~1.21 | 8 (1998~2005)  | Soil cores were collected at depth 0–15 cm.                                                                                                                                                                                                                                            |
| Singh et al. (1996)        | 4 | Constant head                    | √ | 9.80      | 10 (1979~1988) | Soil cores were collected at depth 0–20 cm.                                                                                                                                                                                                                                            |
| Smith et al. (2007)        | 1 | Double ring (50~90)              | √ |           | 1              | Soil samples were collected at depths 0–7.5 and 7.5–15 cm.                                                                                                                                                                                                                             |
| So et al. (2009)           | 1 | Rainfall simulator               | √ | 2.88      | 14             | A double-ring infiltrometer with two concentric metal rings were co-located with tensiometers placed at depths of 15, 30 and 60 cm in the soil profile located just outside the inner ring.                                                                                            |
| Soracco et al. (2010)      | 6 | Constant head                    | √ |           | 7              | A rainfall simulator with an intensity of 80 mm h <sup>-1</sup> was used to determine the infiltration characteristics of the bare soil using plots of 2 m x 1.5 m                                                                                                                     |
| Starr and Glotfelty (1990) | 4 | Double ring (75~150)             | √ | 2.40~3.00 | 13 (1974~1986) | Soil samples were collected at depths 0–15 and 15–30 cm.                                                                                                                                                                                                                               |
| Steenhuis et al. (1990)    | 1 | Single ring (70)                 | √ |           | 3              | Each microplot was instrumented with a double-ring infiltrometer that was pushed into the soil to a depth of about 10 cm.                                                                                                                                                              |
|                            |   |                                  |   |           |                | A 70-cm-diameter single-ring infiltrometer was pushed into the soil to a depth of 5 cm.                                                                                                                                                                                                |

|                           |   |                     |   |           |                |                                                                                                                                                                                                                        |
|---------------------------|---|---------------------|---|-----------|----------------|------------------------------------------------------------------------------------------------------------------------------------------------------------------------------------------------------------------------|
| Stone and Schlegel (2010) | 2 | Double ring         | √ | 1.90      | 12 (1989~2000) | Rings were positioned to avoid vehicle traffic paths, driven 13 cm deep, and filled twice with water. At sunup 2 d later, water was added to the infiltrometers, and ponding was maintained at a depth of ~3 to 10 cm. |
| Tan et al. (2002)         | 2 | Constant head       | √ |           | 5 (1995~1999)  | Soil cores were collected at depth 0–30 cm.                                                                                                                                                                            |
| TerAvest et al. (2015)    | 2 | Rainfall simulator  | √ | 0.29~2.79 | 3              | Rainfall simulations were conducted 6–7 weeks after planting, between crop rows, when soils were at or near field capacity.                                                                                            |
| Villarreal et al. (2017)  | 1 | Tension disc (12.5) | √ | √         | 16 (2000~2015) | Infiltration runs were performed at three values of soil water pressure head, h (namely, -6, -3 and 0 cm, applied in this order and at the same place).                                                                |
| Wu et al. (2014)          | 6 | Tension disc        | √ |           | 12             |                                                                                                                                                                                                                        |
| Xin et al. (2005)         | 4 | Rainfall simulator  | √ |           | 4 (2001~2004)  | The swing sprinkler rainfall simulator produced by Queensland Department of primary industries is adopted. The sprinkler model of rainfall simulator (RFs) is Veeject 80100, with a total of 3 nozzles.                |
| Xu and Mermoud (2001)     | 3 | Guelph              | √ | 0.34~1.10 | 1              | Measurements were performed in holes of diameter 6 cm and of depths 15 or 35 cm.                                                                                                                                       |

<sup>a</sup> Number of paired observation for  $K_{sat}$ ; <sup>b</sup> The numbers in parentheses indicate the diameter (cm) of the device. For double ring method, the diameters of inner and outer rings are provided; <sup>c</sup> Infiltration rate; <sup>d</sup> Saturated hydraulic conductivity; <sup>e</sup> Organic matter content. If the literature only provided the organic carbon content, the organic matter content was estimated using the 1.724 conversion factor.

## Reference list for meta-analysis

Abu, S.T., Abubakar, I.U., 2013. Evaluating the effects of tillage techniques on soil hydro-physical properties in Guinea Savanna of Nigeria. *Soil & Tillage Research* 126, 159-168.

Afyuni, M., Wagger, M.G., 2006. Soil physical properties and bromide movement in relation to tillage system. *Communications in Soil Science and Plant Analysis* 37, 541-556.

Alletto, L., Coquet, Y., 2009. Temporal and spatial variability of soil bulk density and near-saturated hydraulic conductivity under two contrasted tillage management systems. *Geoderma* 152, 85-94.

Anikwe, M.A.N., Ubochi, J.N., 2007. Short-term changes in soil properties under tillage systems and their effect on sweet potato (*Ipomea batatas* L.) growth and yield in an Ultisol in south-eastern Nigeria. *Australian Journal of Soil Research* 45, 351-358.

Azooz, R.H., et al., 1996. Pore size distribution and hydraulic conductivity affected by tillage in Northwestern Canada. *Soil Science Society of America Journal* 60, 1197-1201.

Baumhardt, R.L., et al., 2012. Residue and long-term tillage and crop rotation effects on simulated rain infiltration and sediment transport. *Soil Sci. Soc. Am. J.* 76, 1370–1378.

Blanco-Canqui, H., et al., 2017. Long-term tillage impact on soil hydraulic properties. *Soil & Tillage Research* 170, 38-42.

Blanco-Canqui, H., et al., 2004. Tillage and Crop Influences on Physical Properties for an Epiaqualf. *Soil Science Society of America Journal* 68, 567-576.

Busari, M.A., 2017. Soil physical properties in relation to maize (*Zea mays*) yield after tillage and application of organic and inorganic fertilisers in Abeokuta, southwestern Nigeria. *Soil Research* 55, 704-714.

Cai, L., et al., 2012. Effect of different tillage methods on soil water retention and infiltration capability of rainfed field. *Journal of Desert Research* 32, 1362-1367. (in Chinese)

Cameira, M.R., et al., 2003. Soil macropore dynamics affected by tillage and irrigation for a silty loam alluvial soil in southern Portugal. *Soil & Tillage Research* 70, 131-140.

Cui, S., et al., 2013. Tillage effects on nitrogen leaching and nitrous oxide emission from double-cropped paddy fields. *Agronomy Journal* 106, 15-23.

Curtis, M.J., Claassen, V.P., 2009. Regenerating topsoil functionality in four drastically disturbed soil types by compost incorporation. *Restoration Ecology* 17,

24-32.

De Almeida, W.S., et al., 2018. Effect of soil tillage and vegetal cover on soil water infiltration. *Soil & Tillage Research* 175, 130-138.

Du, Z., et al., 2011. Effect of conservation tillage on soil quality in the piedmont plain of Mount Taihang. *Chinese Journal of Eco-Agriculture* 19, 1134-1142. (in Chinese)

Fasinmirin, J.T., 2011. Saturated Hydraulic Conductivity ( $K_{\theta s}$ ) of a Sub-Tropical Ultisol under different Tillage Systems. *Soil and Tillage Research Conference, Nigeria, At Nigeria, Volume: 1.*

Gao, J., Zhang, C., 2010. The effects of different conservation tillage on soil physical structures of dry farmland in the Loess Plateau. *Agricultural Research in Arid Areas* 28, 192-196. (in Chinese)

Gómez, J.A., 1999. Effects of tillage method on soil physical properties, infiltration and yield in an olive orchard. *Soil & Tillage Research* 52, 167-175.

Gupta, R.K., et al., 1997. Surface water quality impacts of tillage practices under liquid swine manure application. *Journal of the American Water Resources Association* 33, 681-687.

Haruna, S.I., et al., 2018. Soil Hydraulic Properties: Influence of Tillage and Cover Crops. *Pedosphere* 28, 430-442.

Hati, K.M., et al., 2015. Effects of Tillage, Residue and Fertilizer Nitrogen on Crop Yields, and Soil Physical Properties Under Soybean–Wheat Rotation in Vertisols of Central India. *Agricultural Research*, DOI: 10.1007/s40003-014-0141-7.

He, J., et al., 2009. Soil physical properties and infiltration after long-term no-tillage and ploughing on the Chinese Loess Plateau. *New Zealand Journal of Crop and Horticultural Science* 37, 157-166.

Iqbal, M., et al., 2005. Residual Effect of Tillage and Farm Manure on Some Soil Physical Properties and Growth of Wheat (*Triticum aestivum* L.). *International Journal of Agriculture & Biology* 7, 54-57.

Jakab, G., et al., 2017. Infiltration and soil loss changes during the growing season under ploughing and conservation tillage. *Sustainability* 9, 1726.

Jarecki, M.K., Lal, R., 2005. Soil organic carbon sequestration rates in two long-term no-till experiments in Ohio. *Soil Science* 170, 280-291.

Jemai, I., et al., 2012. On-farm assessment of tillage impact on the vertical distribution of soil organic carbon and structural soil properties in a semiarid region in Tunisia. *Journal of Environmental Management* 113, 488-494.

Johnson-Maynard, J.L., et al., 2007. Earthworm dynamics and soil physical properties in the first three years of no-till management. *Soil & Tillage Research* 94, 338-345.

Kahlon, M.S., et al., 2013. Twenty two years of tillage and mulching impacts on soil



physical characteristics and carbon sequestration in Central Ohio. *Soil & Tillage Research* 126, 151-158.

Kahlon, M.S., Chawla, K., 2017. Effect of tillage practices on least limiting water range in Northwest India. *International Agrophysics* 31, 183-194.

Kennedy, A.C., Schillinger, W.F., 2006. Soil quality and water intake in traditional-till vs. no-till paired farms in Washington's Palouse region. *Soil Sci. Soc. Am. J.* 70, 940-949.

Khorami, S.S., et al., 2018. Changes in soil properties and productivity under different tillage practices and wheat genotypes: A short-term study in Iran. *Sustainability* 10, 3273.

Kreiselmeier, J., et al., 2020. Temporal variations of the hydraulic conductivity characteristic under conventional and conservation tillage. *Geoderma* 362, 114127.

Langhans, C., et al., 2011. Experimental rainfall-runoff data: Reconsidering the concept of infiltration capacity. *Journal of Hydrology* 399, 255-262.

Liu, Z., et al., 2018. Land use dependent variation of soil water infiltration characteristics and their scale-specific controls. *Soil & Tillage Research* 178, 139-149.

Lozano, L.A., et al., 2016. Soil Physical Quality and Soybean Yield as Affected by Chiseling and Subsoiling of a No-Till Soil. *Revista Brasileira De Ciencia Do Solo* v40, e0150160.

Luo, Z., et al., 2005. Effects of conservation tillage on bulk density and water infiltration of surface soil in semi-arid area of west Loess Plateau. *Agricultural Research in the Arid Areas*, 23, 7-11. (in Chinese)

Maulé and Reed, 1993. Infiltration under no-till and conventional tillage systems in Saskatchewan. *Canadian Agricultural Engineering* 35, 165-173.

McGarry, D., et al., 2000. Contrasting soil physical properties after zero and traditional tillage of an alluvial soil in the semi-arid subtropics. *Soil and Tillage Research* 53, 105-115.

Moebius-Clune, B.N., et al., 2008. Long-Term Effects of Harvesting Maize Stover and Tillage on Soil Quality. *Soil Science Society of America Journal* 72, 960-969.

Moebius, B.N., et al., 2007. Evaluation of laboratory-measured soil properties as indicators of soil physical quality. *Soil Science* 172, 895-912.

Mervin, I.A., et al., 1994. Orchard groundcover management impacts on soil physical properties. *J. Amer. Soc. Hort. Sci.* 119, 216-222.

Ndiaye et al., 2005. Effect of rainfall and tillage direction on the evolution of surface crusts, soil hydraulic properties and runoff generation for a sandy loam soil. *Journal of Hydrology* 307, 294-311.

Nyamadzawo, G., et al., 2007. Improved legume tree fallows and tillage effects on structural stability and infiltration rates of a kaolinitic sandy soil from central Zimbabwe. *Soil & Tillage*

Research 96, 182-194.

Obalum, S.E., Obi, M.E., 2010. Physical properties of a sandy loam Ultisol as affected by tillage-mulch management practices and cropping systems. *Soil & Tillage Research* 108, 30-36.

Osunbitan, J.A., et al., 2005. Tillage effects on bulk density, hydraulic conductivity and strength of a loamy sand soil in southwestern Nigeria. *Soil & Tillage Research* 82, 57-64.

Pan, Y., et al., 2016. Effects of long-term tillage and mulching methods on properties of surface soil and maize yield in tableland region of the Loess Plateau. *Journal of Plant Nutrition and Fertilizer* 22, 1558-1567. (in Chinese)

Park, I., et al., 1992. Runoff, soil loss and soil physical property changes of light textured surface soils from long-term tillage treatments. *Australian Journal of Soil Research* 30, 789-806.

Park, E.J., Smucker, A.J.M., 2005. Saturated Hydraulic Conductivity and Porosity within Macroaggregates Modified by Tillage. *Soil Science Society of America Journal* 69, 38-45.

Parvin, N., et al., 2014. Effect of mouldboard ploughing and shallow tillage on sub-soil physical properties and crop performance. *Soil Science and Plant Nutrition* 60, 38-44.

Potter, K.N., et al., 1995. Tillage and residue effects on infiltration and sediment losses on Vertisols. *Transactions of the ASAE* 38, 1413-1419.

Ramos, M.C., et al., 2019. Soil sealing and soil water content under no - tillage and conventional tillage in irrigated corn: Effects on grain yield. *Hydrological Processes* 33, 2095–2109.

Sartori, F., et al., 2022. A multivariate approach to evaluate reduced tillage systems and cover crop sustainability. *Land* 11, 55.

Sasal, M.C., et al., 2006. Soil porosity characteristics and water movement under zero tillage in silty soils in Argentinian Pampas. *Soil & Tillage Research* 87, 9-18.

Schlüter, S., et al., 2020. Long-term effects of conventional tillage and no-tillage on saturated and near-saturated hydraulic conductivity – Can their prediction be improved by pore metrics obtained with X-ray CT? *Geoderma* 361, 114082.

Sharma, K.L., et al., 2005. Long-term soil management effects on crop yields and soil quality in a dryland Alfisol. *Soil & Tillage Research* 83, 246-259.

Sharma, K.L., et al., 2009. Influence of Tillage and Nutrient Sources on Yield Sustainability and Soil Quality under Sorghum-Mung Bean System in Rainfed Semi-arid Tropics. *Communications in Soil Science and Plant Analysis* 40, 2579-2602.

Singh, B., et al., 1996. Soil hydraulic properties of an Orthic Black Chernozem under long-term tillage and residue management. *Canadian Journal of Soil Science* 76, 63-71.

Smith, D.R., et al., 2007. How does the first year tilling a long-term no-tillage field impact soluble nutrient losses in runoff? *Soil & Tillage Research* 95, 11-18.

So, H.B., et al., 2009. The impact of 14 years of conventional and no-till cultivation on the physical properties and crop yields of a loam soil at Grafton NSW, Australia. *Soil and Tillage Research* 104, 180-184.

Soracco, C.G., et al., 2010. Anisotropy of Saturated Hydraulic Conductivity in a soil under conservation and no-till treatments. *Soil & Tillage Research* 109, 18-22.

Starr, J.L., et al., 1990. Atrazine and bromide movement through a silt loam Soil. *Journal of Environmental Quality* 19, 552-558.

Steenhuis, T.S., et al., 1990. Preferential movement of pesticides and tracers in agricultural soils. *Journal of Irrigation and Drainage Engineering* 116, 50-66.

Stone, L.R., Schlegel, A.J., 2010. Tillage and Crop Rotation Phase Effects on Soil Physical Properties in the West-Central Great Plains. *Agronomy Journal* 102, 483-491.

Tan, C.S., et al., 2002. Effect of long-term conventional tillage and no-tillage systems on soil and water quality at the field scale. *Water Science & Technology* 46, DOI: 10.2166/wst.2002.0678.

TerAvest, D., et al., 2015. Crop production and soil water management in conservation agriculture, no-till, and conventional tillage systems in Malawi. *Agriculture, Ecosystems and Environment* 212, 285-296.

Villarreal, R., et al., 2017. Temporal variation of soil sorptivity under conventional and no-till systems determined by a simple laboratory method. *Soil & Tillage Research* 168, 92-98.

Wu, J., et al., 2014. Effects of conservation tillage on soil physical properties of rained field of the Loess Plateau in Central of Gansu. *Journal of Soil and Water Conservation* 28, 112-117. (in Chinese)

Xin, P., et al., 2005. Effects of different tillage methods on saturated hydraulic conductivity and compactiveness of the surface soil. *Journal of Gansu Agricultural University* 40, 203-207.

Xu, D., Mermoud, A., 2001. Topsoil properties as affected by tillage practices in North China. *Soil & Tillage Research* 60, 11-19.
